# Supplementary material for: Multiple strategies of porous tetrametallene for efficient ethanol electrooxidation
Source: Royal Society of Chemistry journal article supplement (doi:10.1039/d2ta05109e), 2022-01-01
Supplement: d2ta05109e1.pdf [file d2ta05109e1.pdf]

## Supporting Information for

# Multiple strategies of porous tetrametallene for efficient ethanol electrooxidation

Juan Xiong,<sup>a</sup> Hongdong Li,<sup>a</sup> Yue Pan,<sup>a</sup> Jiao Liu,<sup>a</sup> Yan Zhang,<sup>a</sup> Jixiang Xu,<sup>a</sup> Bin Li,<sup>c</sup> Jianping Lai,<sup>\*,a</sup>

and Lei Wang<sup>\*,a,b</sup>

<sup>a</sup> Key Laboratory of Eco-chemical Engineering, Ministry of Education, International Science and Technology Cooperation Base of Eco-chemical Engineering and Green Manufacturing, College of Chemistry and Molecular Engineering, Qingdao University of Science and Technology, Qingdao 266042, P. R. China.

<sup>b</sup> Shandong Engineering Research Center for Marine Environment Corrosion and Safety Protection, College of Environment and Safety Engineering, Qingdao University of Science and Technology, Qingdao 266042, P. R. China.

<sup>c</sup> College of Materials Science and Engineering, Qingdao University of Science and Technology, Qingdao 266061, P. R. China.

\*E-mail: jplai@qust.edu.cn (Jianping Lai); inorchemwl@126.com (Lei Wang)

**Chemicals:** Palladium (II) acetylacetonate ( $\text{Pd}(\text{acac})_2$ , 99%) was purchased from Sigma-Aldrich. Tungsten hexacarbonyl ( $\text{W}(\text{CO})_6$ , 97%) purchased from Alfa Aesar. Rhodium (III) acetylacetonate ( $\text{Rh}(\text{acac})_3$ , 97%) and Bisumuth(III) chloride ( $\text{BiCl}_3$ , 98%) were obtained from Sinopharm Chemical Reagent Co. LTD. Potassium hydroxide (KOH, 85%) and acetic acid ( $\text{CH}_3\text{COOH}$ , 99.5%) were obtained from Aladdin. N, N-Dimethylformamide (DMF, 99.5%) and ethanol ( $\text{CH}_3\text{CH}_2\text{OH}$ , 99.8%) was obtained from Xilong Scientific Co., Ltd. All the chemicals were used without further purification. All the solutions were prepared by high purity water ( $18.2 \text{ M}\Omega \text{ cm}^{-1}$ ).

1 **Synthesis of porous Pd<sub>97</sub>W<sub>3</sub> porous metallene.** For preparation of defect-rich porous Pd<sub>97</sub>W<sub>3</sub> porous  
2 nanosheet, 10 mg of Pd(acac)<sub>2</sub> and 20 mg of W(CO)<sub>6</sub> were added in to a 20 mL of bottle containing 8  
3 mL of DMF, and then sonicated 30 min to get a yellow transparent solution. Afterwards, 2 mL of acetic  
4 acid was added into the reaction mixture solution, placing in oil bath at 80 °C for 2 h. The obtained black  
5 product was collected by centrifugation and washed with ethanol for 3 times, and the defect-rich porous  
6 Pd<sub>97</sub>W<sub>3</sub> porous nanosheet was dried at 50 °C for further use.

7 **Preparation of PdWM (M = Bi, Rh and RhBi) metallene.** The synthesis of PdWM was similar with  
8 Pd<sub>97</sub>W<sub>3</sub>, except the addition of 6 mg BiCl<sub>3</sub> and Rh(acac)<sub>3</sub>. For Pd<sub>66</sub>W<sub>15</sub>Rh<sub>12</sub>Bi<sub>7</sub>, Pd<sub>61</sub>W<sub>10</sub>Rh<sub>17</sub>Bi<sub>12</sub> and  
9 Pd<sub>59</sub>W<sub>8</sub>Rh<sub>19</sub>Bi<sub>14</sub>, the dosage of BiCl<sub>3</sub> was changed to 3 mg, 4 mg and 5 mg respectively, the dosage of  
10 Rh(acac)<sub>3</sub> was changed to 3 mg, 2 mg and 1 mg respectively.

11 **Characterization.** The morphologies of the samples were characterized by transmission electron  
12 microscopy (TEM) and high-resolution TEM (HRTEM) on an FEI Tecnai-G2 F30 at an accelerating  
13 voltage of 300 KV. The high-resolution transmission microscopy (HRTEM) images and energy  
14 dispersive X-ray spectroscopy (EDS) were taken by JEOL JEM-F200. Powder X-ray diffraction (XRD)  
15 S2 spectra were recorded on an X'Pert-Pro X-ray powder diffractometer equipped with a Cu radiation  
16 source ( $\lambda = 0.15406$  nm). The chemical valence of each element was collected by X-ray photoelectron  
17 spectra (XPS) on SSI SProbe XPS Spectrometer. The detection of acetic acid and acetaldehyde were  
18 conducted by gas chromatography (GC, SHIMADZU GC2014C). The intermediate products were  
19 detected by in-situ FTIR (Thermo iS50 FT-IR).

20

1 **Electrochemical measurements.** Before the electrochemical property tests, the catalyst and carbon  
2 black were formed into composites. The obtained 1 mg PdWM were dispersed in 10 mL of cyclohexane  
3 and 4 mg carbon (Ketjen Black-300) in 10 mL of ethanol under sonication for 1 h and collected via  
4 centrifugation with ethanol. The as-prepared catalysts were dispersed in a mixture of isopropanol, water  
5 and 5 wt% Nafion solution (v: v: v = 3: 1: 0.05) with a concentration of 1 mg mL<sup>-1</sup>. All the  
6 electrochemical tests were conducted by CHI 660E electrochemical workstation (Chenhua, Shanghai)  
7 with a traditional three-electrode system. The catalysts modified glass carbon electrode was used as  
8 working electrode, a Pt foil was used as counter electrode, and a saturated calomel electrode (SCE) was  
9 used as reference electrode. The potential was calibrated by the Nernst equation that  $E_{(RHE)} = E_{(SCE)} +$   
10  $0.242 + 0.0592 \cdot \text{pH}$ . Before each test, GCE was polished by Al<sub>2</sub>O<sub>3</sub> powder to get a smooth surface. The  
11 modified working electrodes were activated by cyclic voltammetry between 0.09-1.3 V (vs. RHE) at 500  
12 mV s<sup>-1</sup> in N<sub>2</sub>-saturated 1.0 M KOH for 100 cycles to get a clean catalytic surface. EOR tests were  
13 measures in N<sub>2</sub>-saturated 1.0 M KOH contained 1.0 M ethanol between 0.09-1.5 V (vs. RHE) at 50 mV  
14 s<sup>-1</sup>. For the EOR stability tests, chronoamperometric tests were performed at a fixed potential, and 5,000  
15 CVs were also performed to evaluate the stability of catalysts. The CO stripping tests were carried out  
16 by i-t test in CO-saturated 1.0 M KOH at 0.1 V (vs. RHE) for 900 s, and then, CO stripping curves were  
17 recorded between 0-1.2 V vs. RHE at a scan rate of 50 mV s<sup>-1</sup>.

18 **Calculation of C1 selectivity.** The yield of possible EOR product can be conducted by GC and Faradaic  
19 formula. Firstly, a series of acetic acid and acetaldehyde standard solutions has been made with a  
20 stepped concentration (0.1-5 ppm). The standard curve can be drawn with the integral area of GC peak

1 and the concentration of standard solution. Secondly, a long time i-t test has been conducted to collect  
2 the product to be measure. The concentration of as-produced acetic acid and acetaldehyde can be  
3 calculated by the standard curve. Finally, based on the Faradaic formula, the Faradic efficiency of as-  
4 produced acetic acid and acetaldehyde can be calculated as follow:

$$5 \quad FE=(N \times n \times 96485) / Q \times 100\%$$

6 N is the moles of products, n is the number of electron transfer, Q is the total amount of consumed  
7 charge during i-t test. The total FE of EOR was assumed as 100%, the possible C1 selectivity is the  
8 residue of C2 pathway.

9 **Electrochemical *in Situ* FTIR reflectance spectroscopy.** The intermediate products during the EOR  
10 process were detected by *in situ* FTIR through Thermo iS50 FT-IR with a liquid-nitrogen-cooled MCT-  
11 A detector. The *in situ* FTIR curves were collected by the method of external reflection. Firstly, the  
12 catalysts modified silicon crystal plated with gold was used as working electrode, Ag/AgCl and Pt wire  
13 were worked as reference electrode and counter electrode respectively. All the tests were conducted in  
14 N<sub>2</sub> saturated 1 M KOH with 1 M ethanol. The applied potential was stepped positively from 0.1 V to 1.2  
15 V (*vs.* RHE) with an interval of 100 mV. Secondly, the results of *in situ* FTIR were reported as relative  
16 change in reflectivity:  $\Delta R/R = (R(E_S) - R(E_R)) / R(E_R)$ . The R(E<sub>S</sub>) and R(E<sub>R</sub>) are the spectra collected at the  
17 applied potential and reference potential (0.1 V *vs.* RHE). The upward bands represent the consumption  
18 of products, the downward bands represent the formation of reactants.

19  
20  
21  
22  
23  
24

1 **Figures**

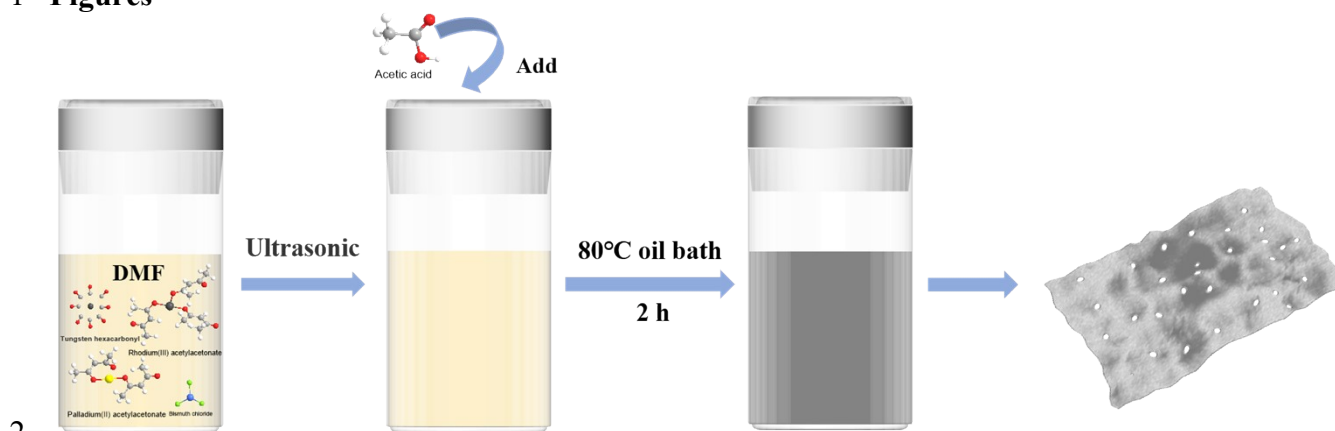

**Fig. S1.** Schematic illustration for the fabrication of Pd<sub>59</sub>W<sub>8</sub>Rh<sub>19</sub>Bi<sub>14</sub> porous metallene.

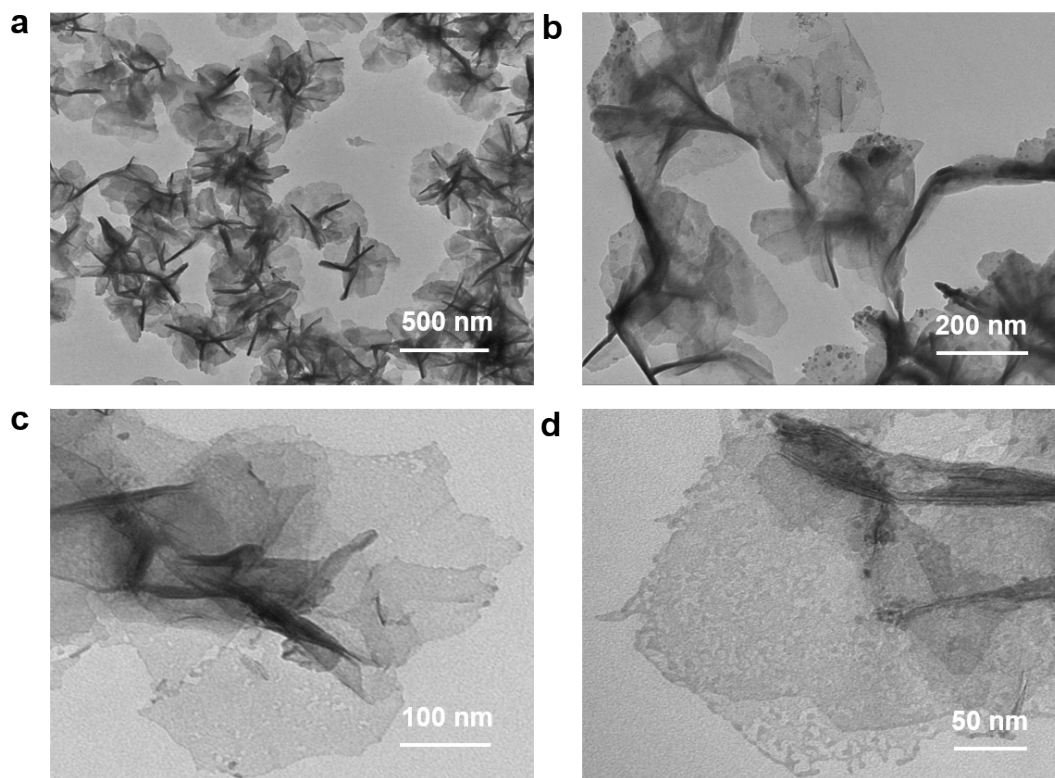

**Fig S2.** TEM images of Pd<sub>59</sub>W<sub>8</sub>Rh<sub>19</sub>Bi<sub>14</sub> metallene at different scales.

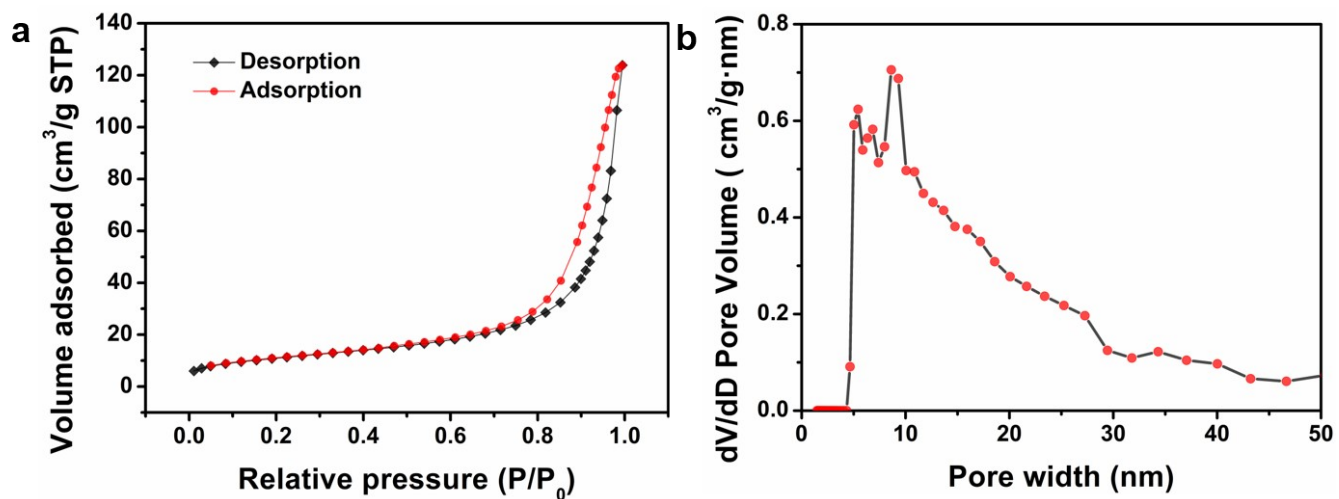

1  
 2 **Fig. S3.** (a) N<sub>2</sub> adsorption/desorption isotherm curve and (b) derived pore size distribution curves of  
 3 Pd<sub>59</sub>W<sub>8</sub>Rh<sub>19</sub>Bi<sub>14</sub>.

4  
 5  
 6  
 7

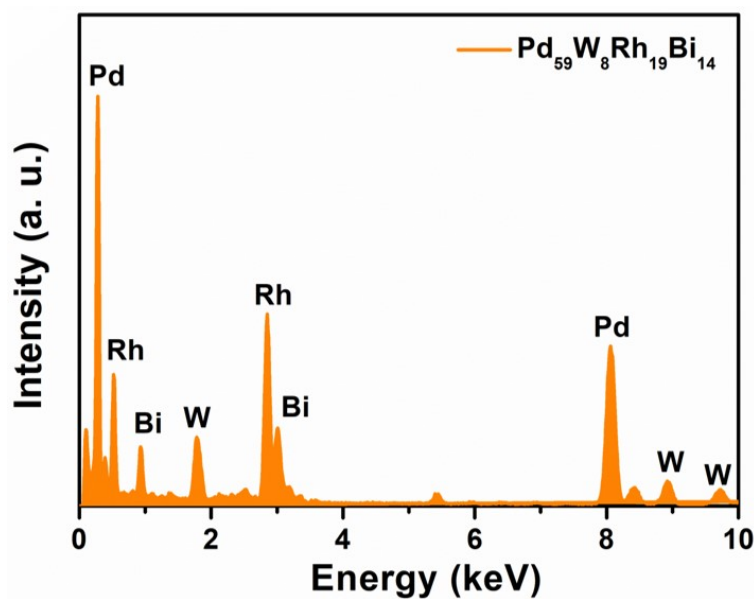

8  
 9  
 10  
 11 **Fig. S4.** EDS spectrum of Pd<sub>59</sub>W<sub>8</sub>Rh<sub>19</sub>Bi<sub>14</sub>.

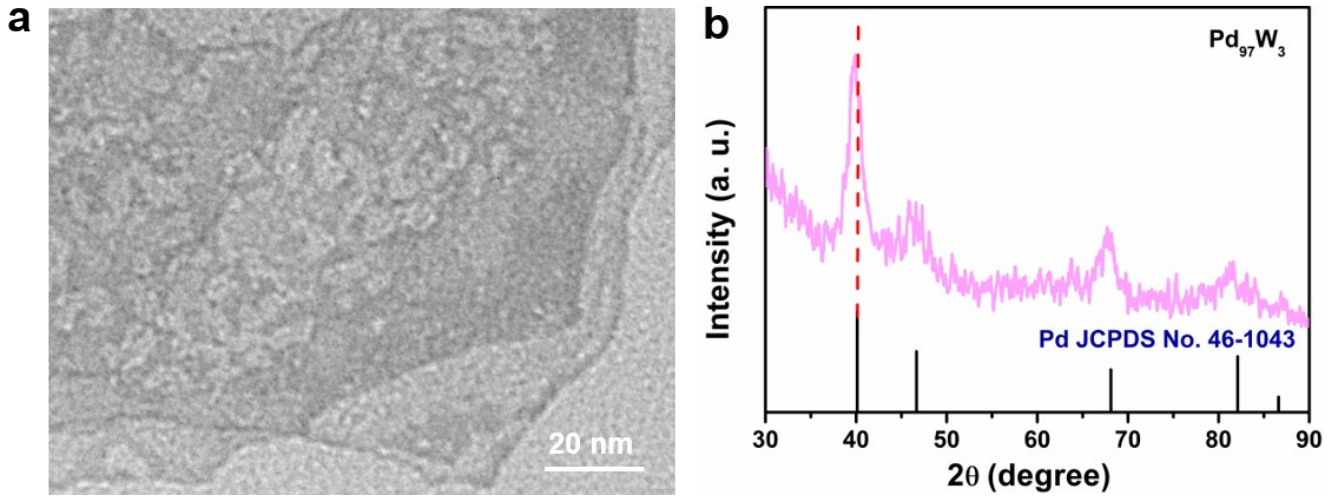

**Fig. S5.** (a) TEM image and (b) XRD pattern of  $\text{Pd}_{97}\text{W}_3$  porous metallene.

1  
2  
3  
4  
5

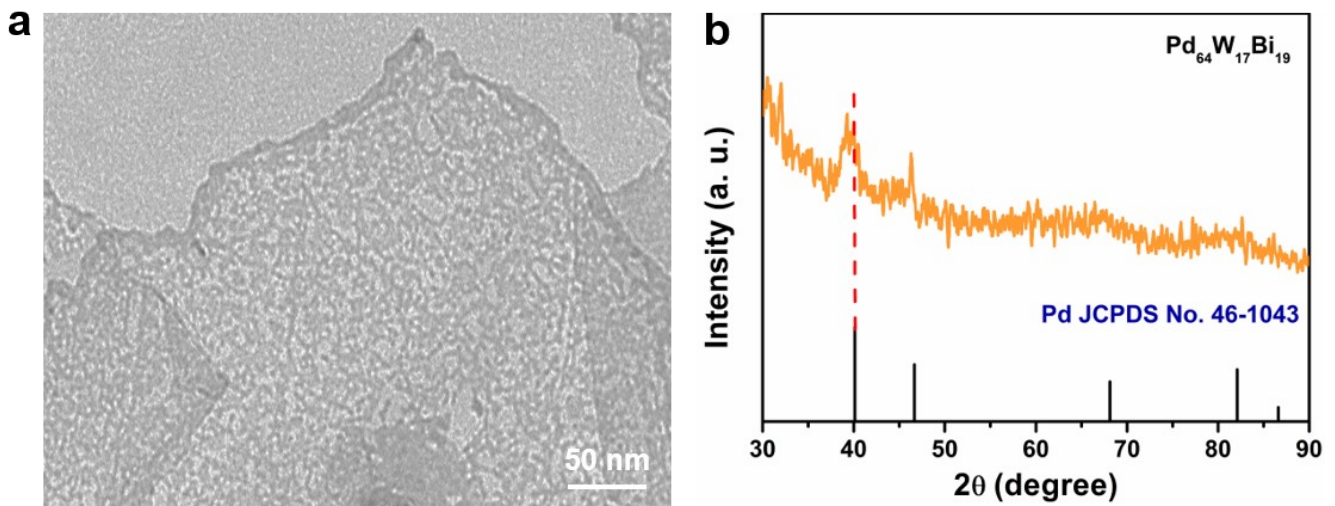

**Fig. S6.** (a) TEM image and (b) XRD pattern of  $\text{Pd}_{64}\text{W}_{17}\text{Bi}_{19}$  porous metallene.

6  
7  
8  
9  
10  
11  
12  
13  
14

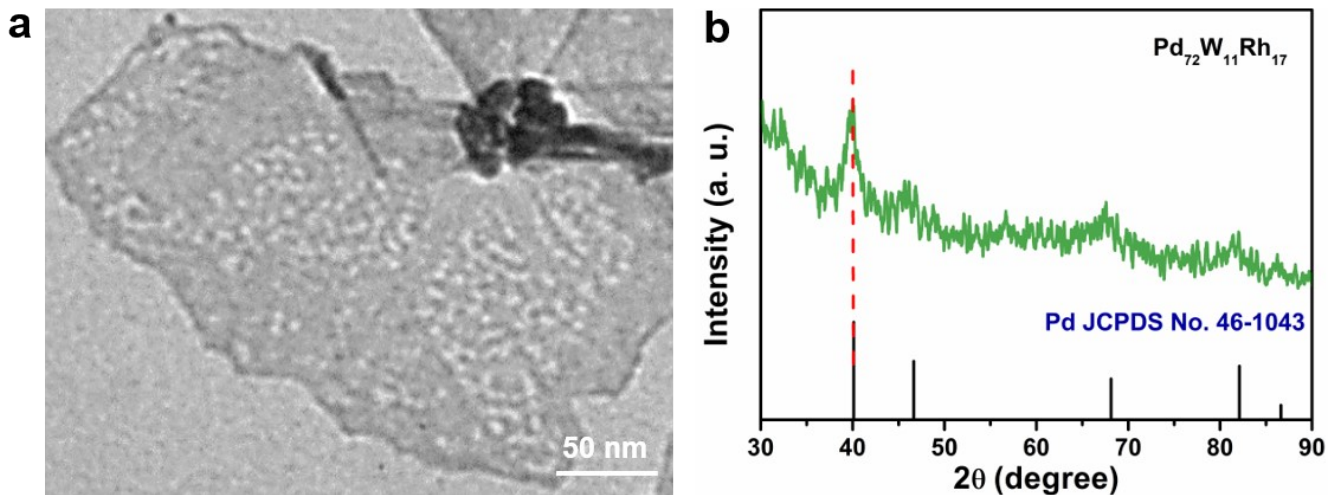

Fig. S7. (a) TEM image and (b) XRD pattern of Pd<sub>72</sub>W<sub>11</sub>Rh<sub>17</sub> porous metallene.

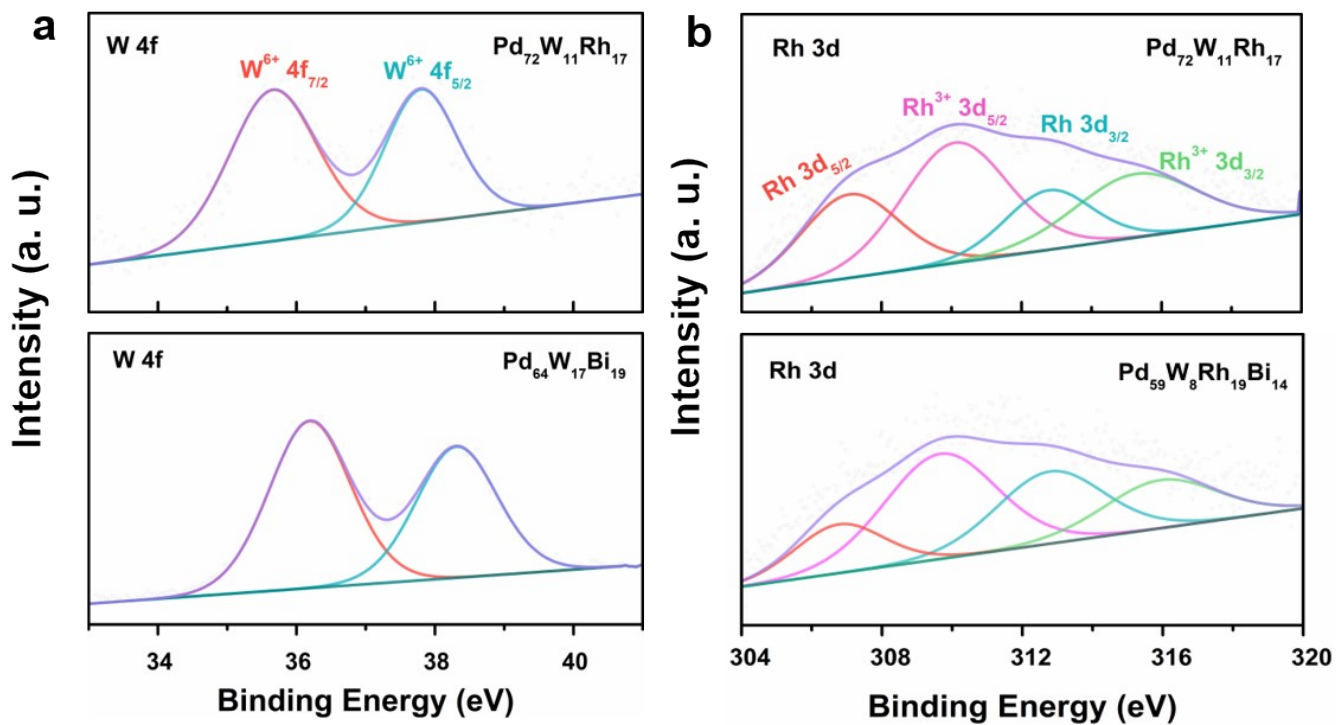

Fig. S8. XPS spectra of as-prepared catalysts. (a) W 4f; (b) Rh 3d.



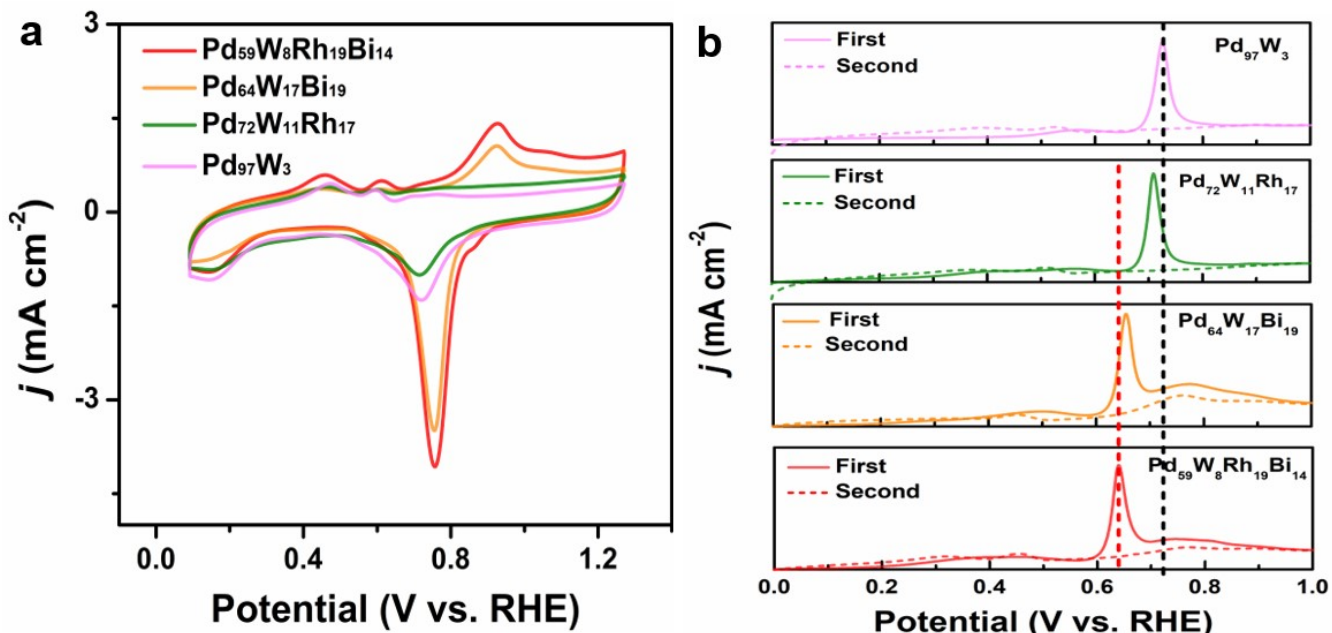

1  
 2 **Fig. S9.** (a) CV of different electrocatalysts recorded in  $N_2$ -saturated 1.0 M KOH. (b) CO stripping  
 3 curves of different electrocatalysts in 1.0 M KOH electrolyte.

4  
 5  
 6  
 7  
 8

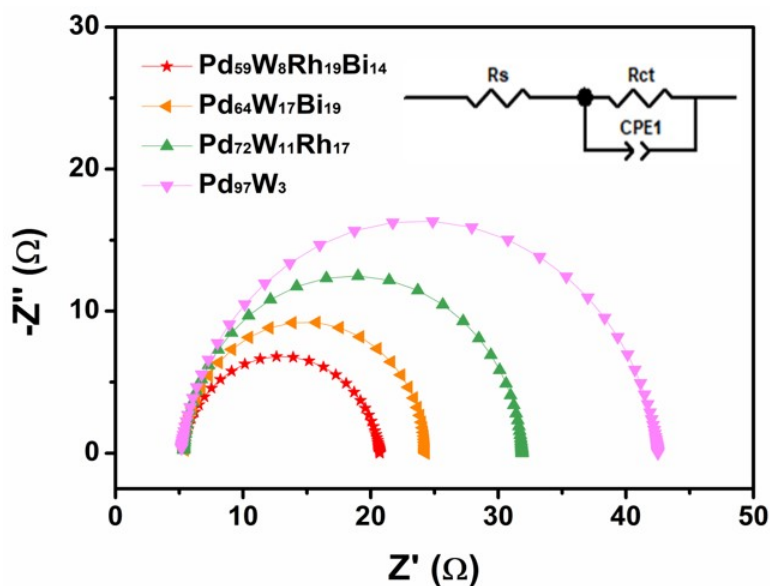

9  
 10 **Fig. S10.** Nyquist diagram of electrochemical oxidation catalyst in 1.0 M KOH+1.0 M ethanol. Inset:  
 11 adjust Nyquist diagram to obtain equivalent circuit, where  $R_s$ : solution resistance,  $R_{ct}$ : charge transfer  
 12 resistance, CPE: phasing element.

13  
 14

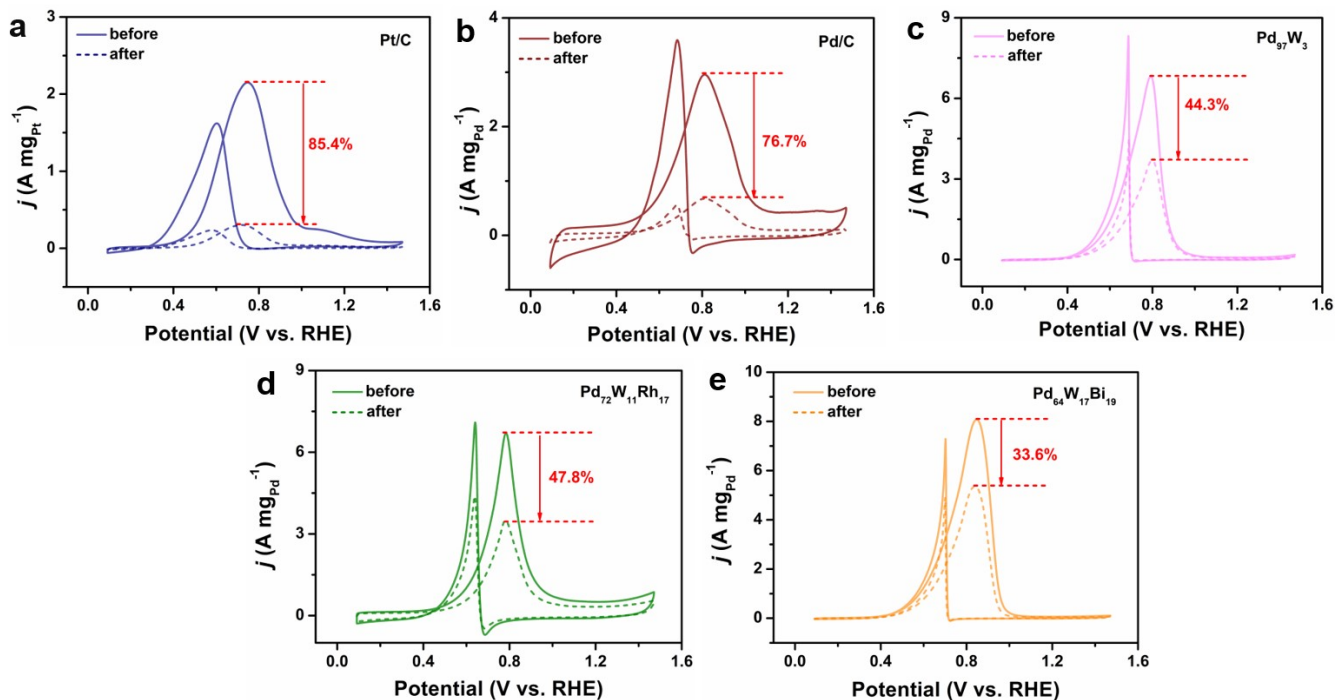

1  
2  
3 **Fig. S11.** CV curves of as-prepared catalysts before and after 5000 cycles test. (a) Pt/C; (b) Pd/C; (c)  
4 Pd<sub>97</sub>W<sub>3</sub>; (d) Pd<sub>72</sub>W<sub>11</sub>Rh<sub>17</sub>; (e) Pd<sub>64</sub>W<sub>17</sub>Bi<sub>19</sub>.

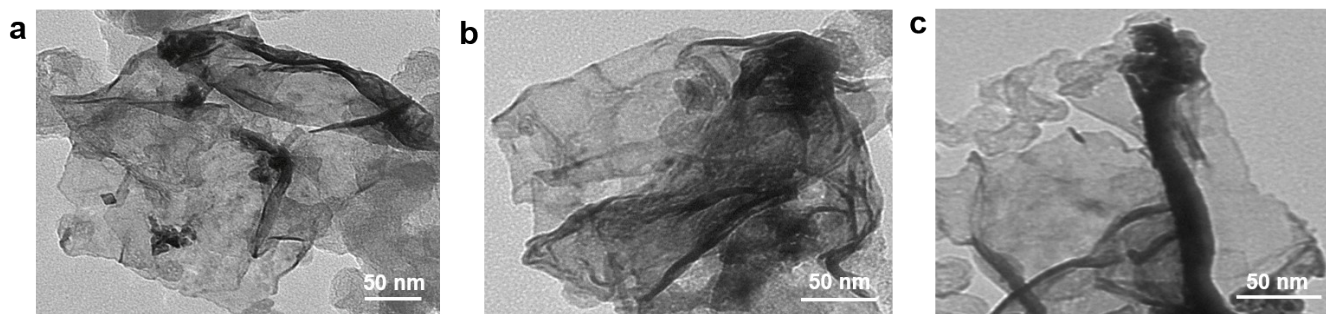

13  
14 **Fig. S12.** Representative TEM images of (a) Pd<sub>97</sub>W<sub>3</sub>, (b) Pd<sub>64</sub>W<sub>17</sub>Bi<sub>19</sub> and (c) Pd<sub>72</sub>W<sub>11</sub>Rh<sub>17</sub> after EOR  
15 stability measurement.

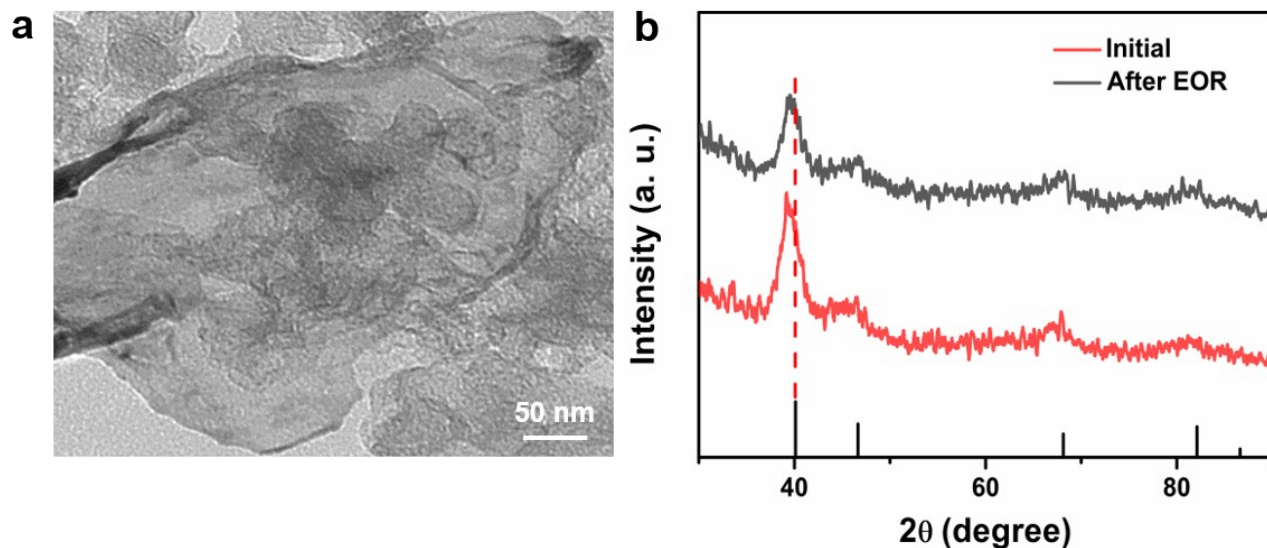

1  
2  
3 **Fig. S13.** (a) TEM image of Pd<sub>59</sub>W<sub>8</sub>Rh<sub>19</sub>Bi<sub>14</sub> metallene after EOR stability measurement. (b) XRD  
4 pattern of the Pd<sub>59</sub>W<sub>8</sub>Rh<sub>19</sub>Bi<sub>14</sub> metallene initial and after EOR stability measurement.

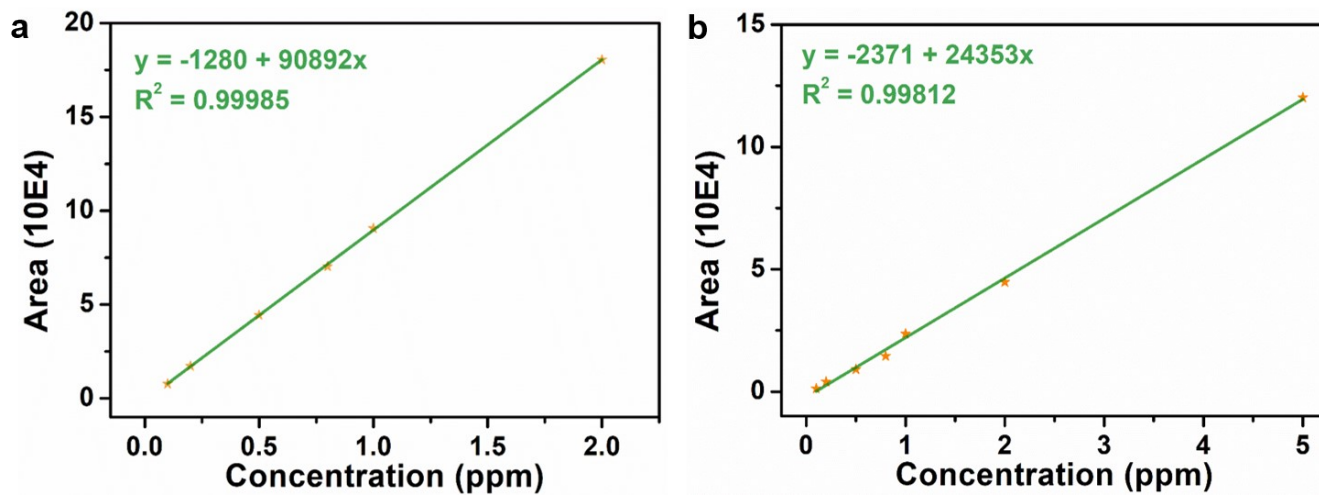

13  
14 **Fig. S14.** The standard curves of (a) acetate and (b) acetaldehyde in GC.

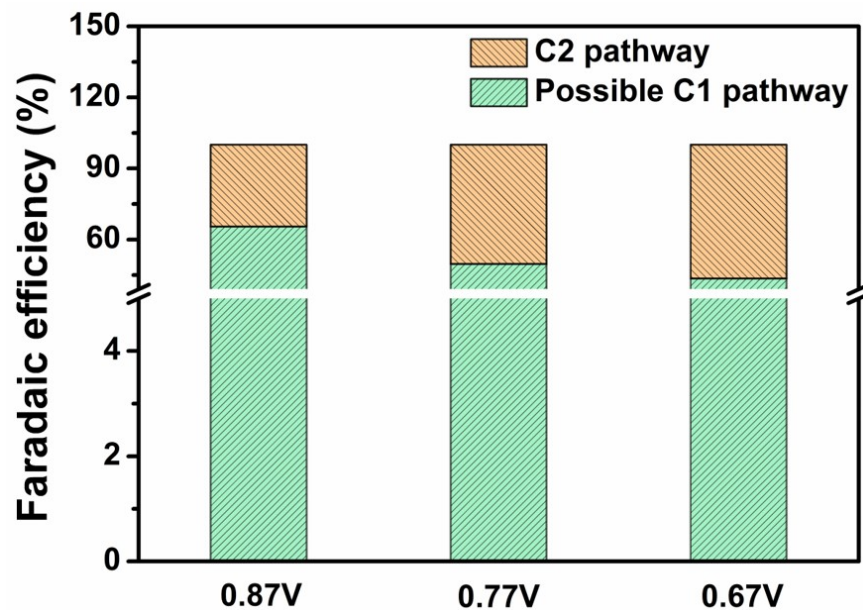

Fig. S15. Faradaic efficiency of Pd<sub>59</sub>W<sub>8</sub>Rh<sub>19</sub>Bi<sub>14</sub> at different voltages.

1  
2  
3  
4  
5  
6  
7  
8  
9  
10

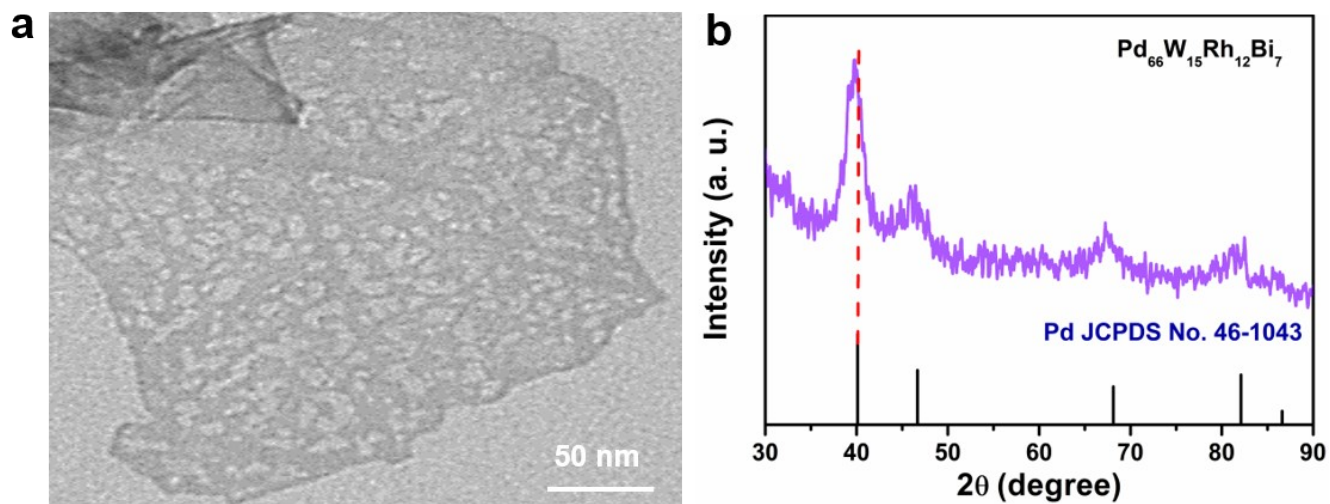

Fig. S16. (a) TEM image and (b) XRD pattern of Pd<sub>66</sub>W<sub>15</sub>Rh<sub>12</sub>Bi<sub>7</sub> porous metallene.

11  
12  
13  
14  
15  
16

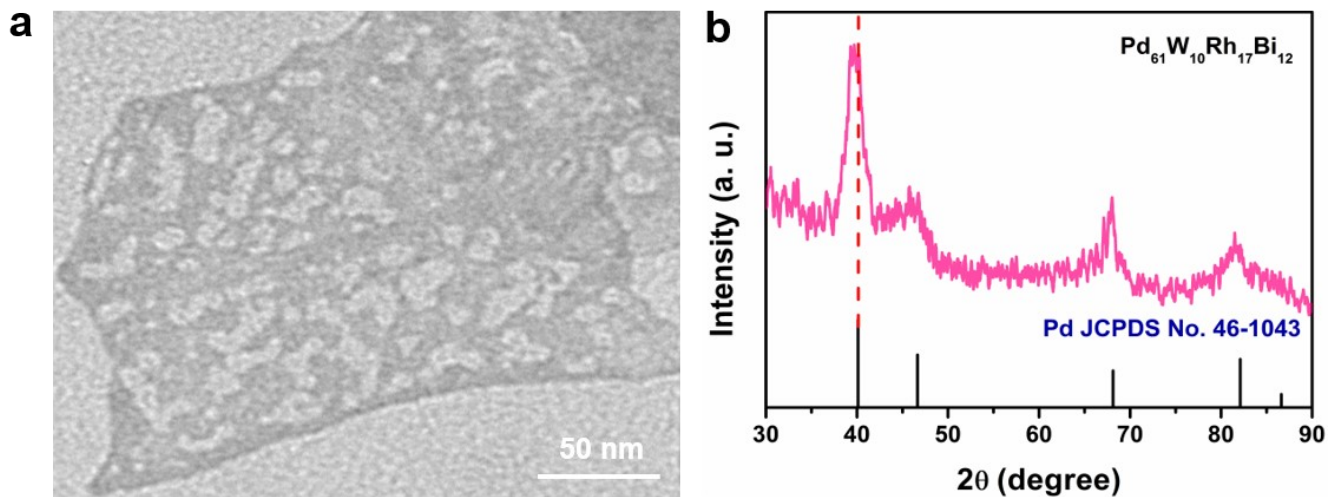

**Fig. S17.** (a) TEM image and (b) XRD pattern of Pd<sub>61</sub>W<sub>10</sub>Rh<sub>17</sub>Bi<sub>12</sub> porous metallene.

1  
2  
3  
4  
5  
6  
7

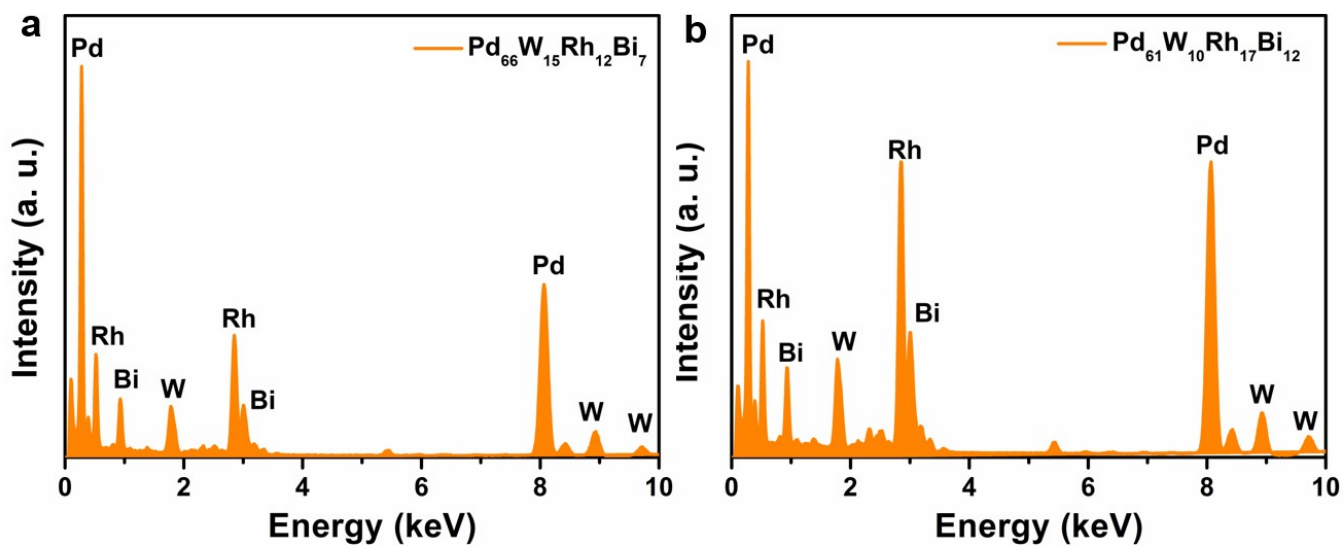

**Fig. S18.** EDS spectra of (a) Pd<sub>66</sub>W<sub>15</sub>Rh<sub>12</sub>Bi<sub>7</sub>, (b) Pd<sub>61</sub>W<sub>10</sub>Rh<sub>17</sub>Bi<sub>12</sub>.

8  
9

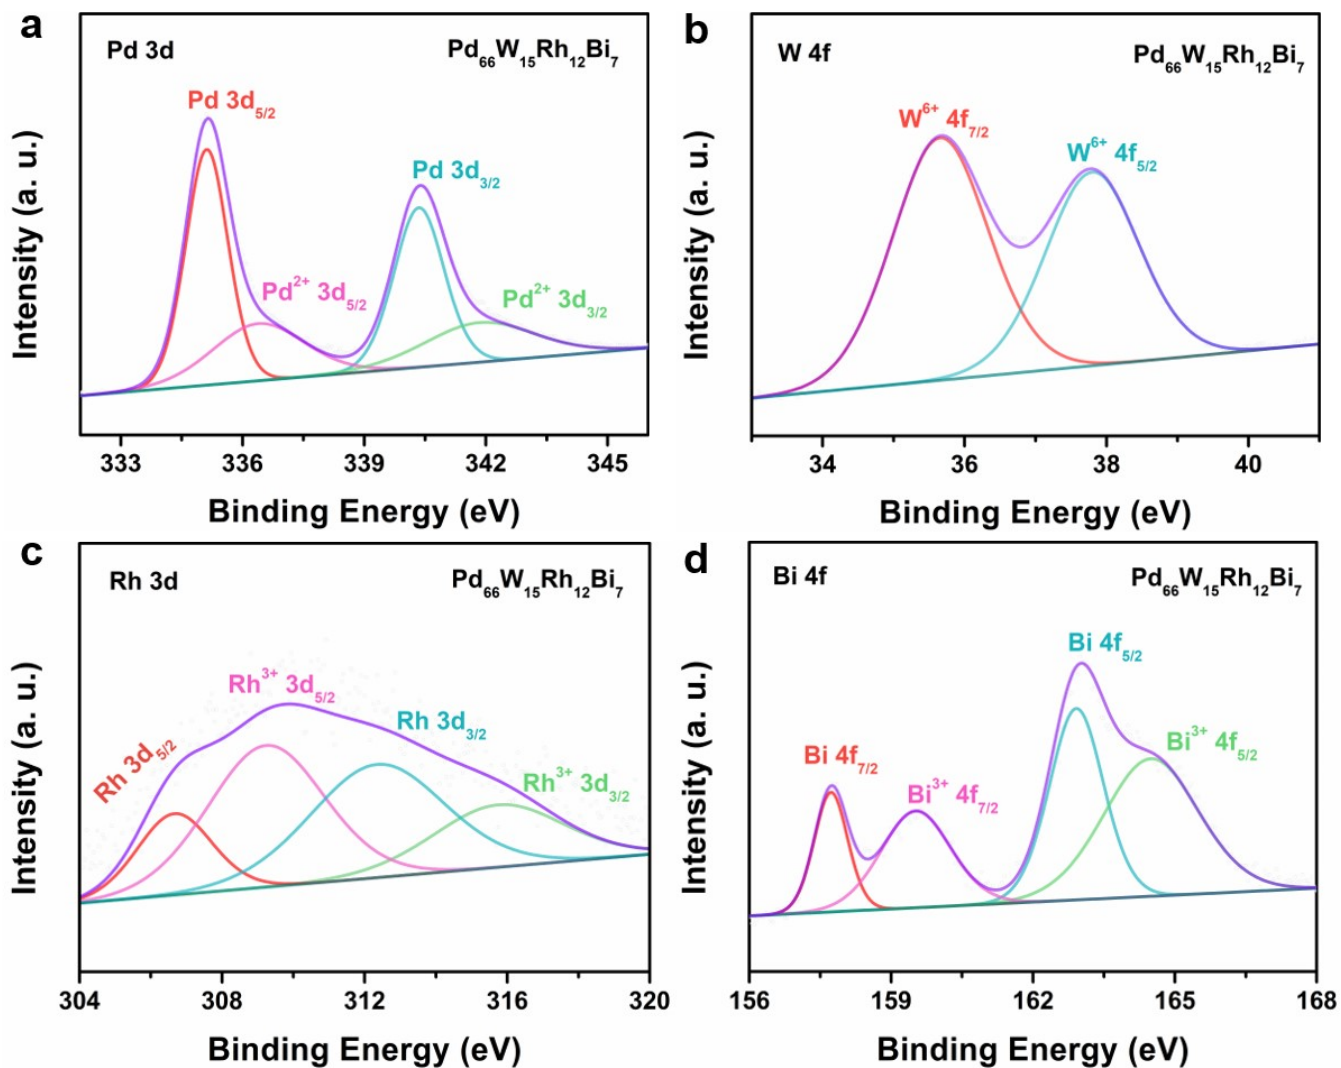

1  
2

Fig. S19. XPS spectra (a) Pd 3d, (b) W 4f and (c) Rh 3d, (d) Bi 4f of  $\text{Pd}_{66}\text{W}_{15}\text{Rh}_{12}\text{Bi}_7$ .

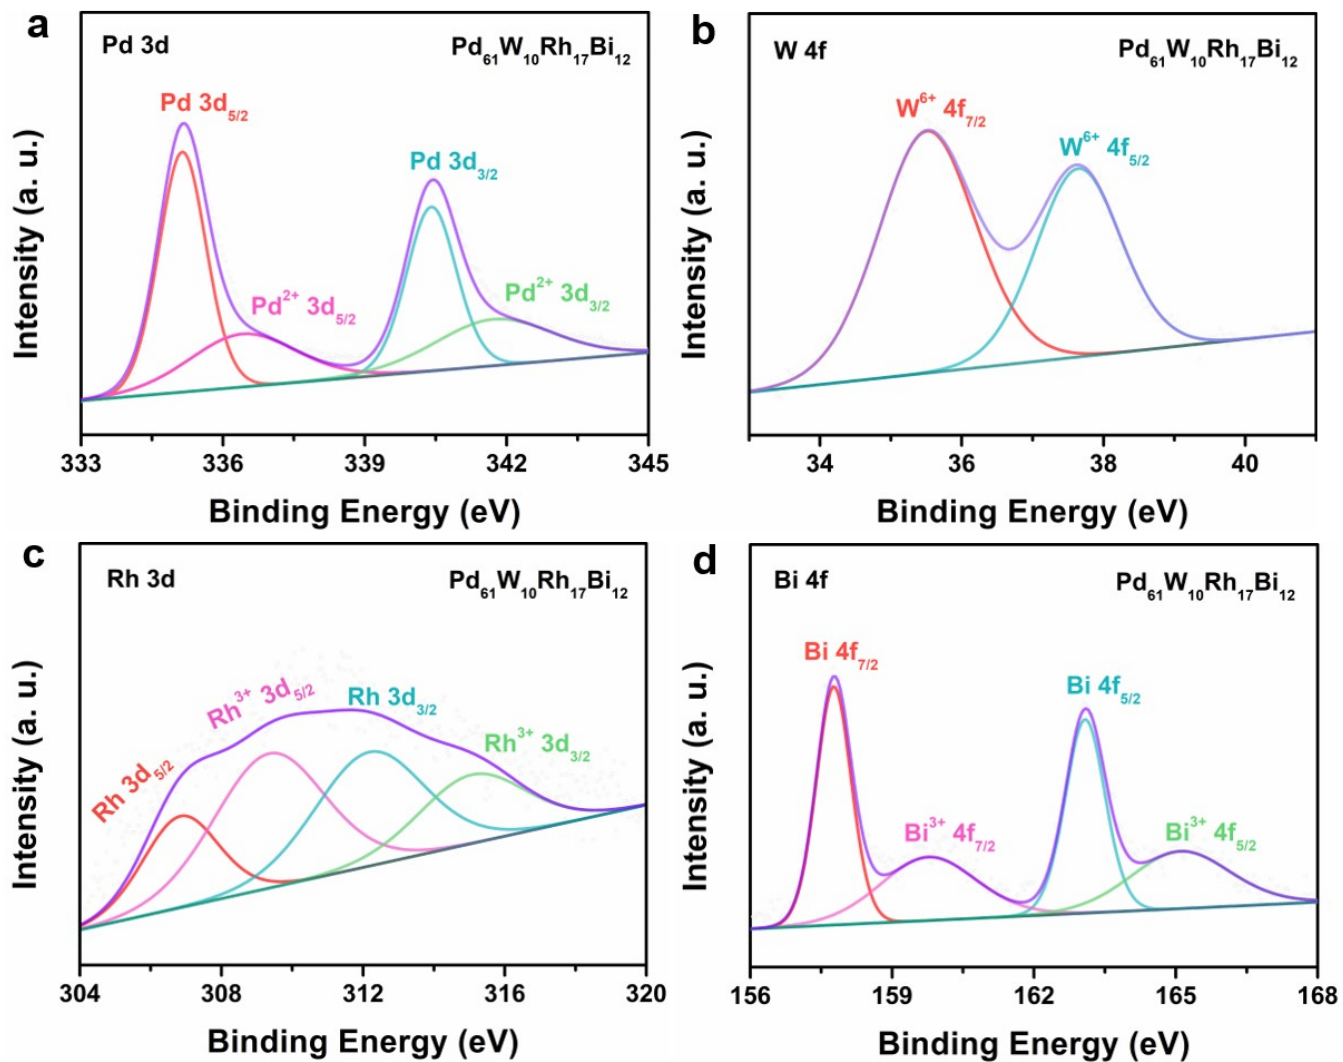

**Fig. S20.** XPS spectra (a) Pd 3d, (b) W 4f and (c) Rh 3d, (d) Bi 4f of  $\text{Pd}_{61}\text{W}_{10}\text{Rh}_{17}\text{Bi}_{12}$ .

1  
2  
3  
4  
5

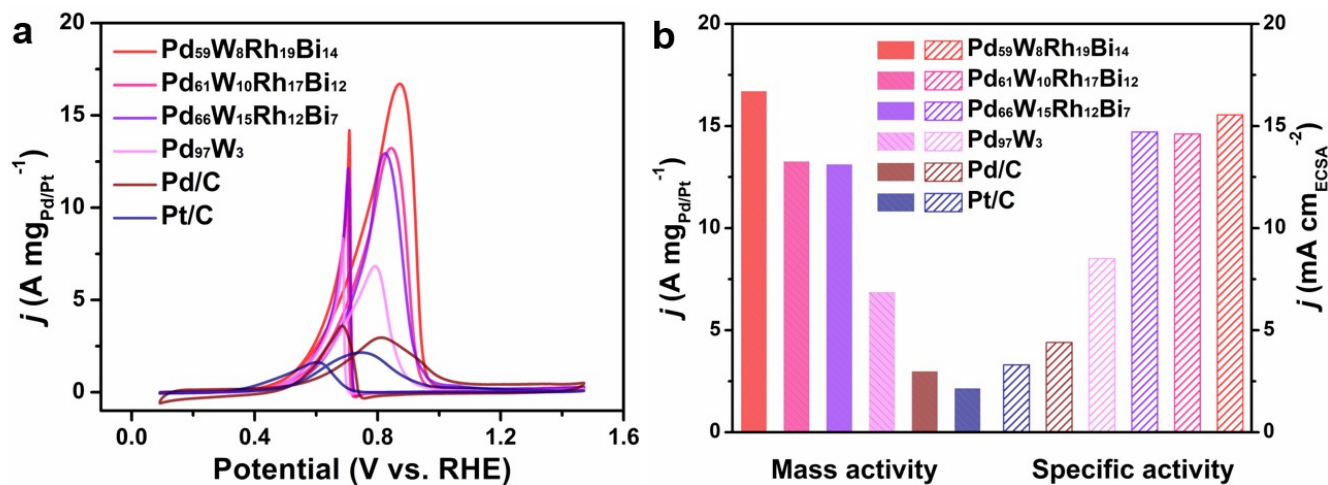

1  
 2 **Fig. S21.** EOR performance of different electrocatalysts. (a) Mass-normalized EOR CVs. (b) histogram  
 3 of specific and mass activity for EOR at peak potentials.  
 4  
 5  
 6  
 7  
 8  
 9

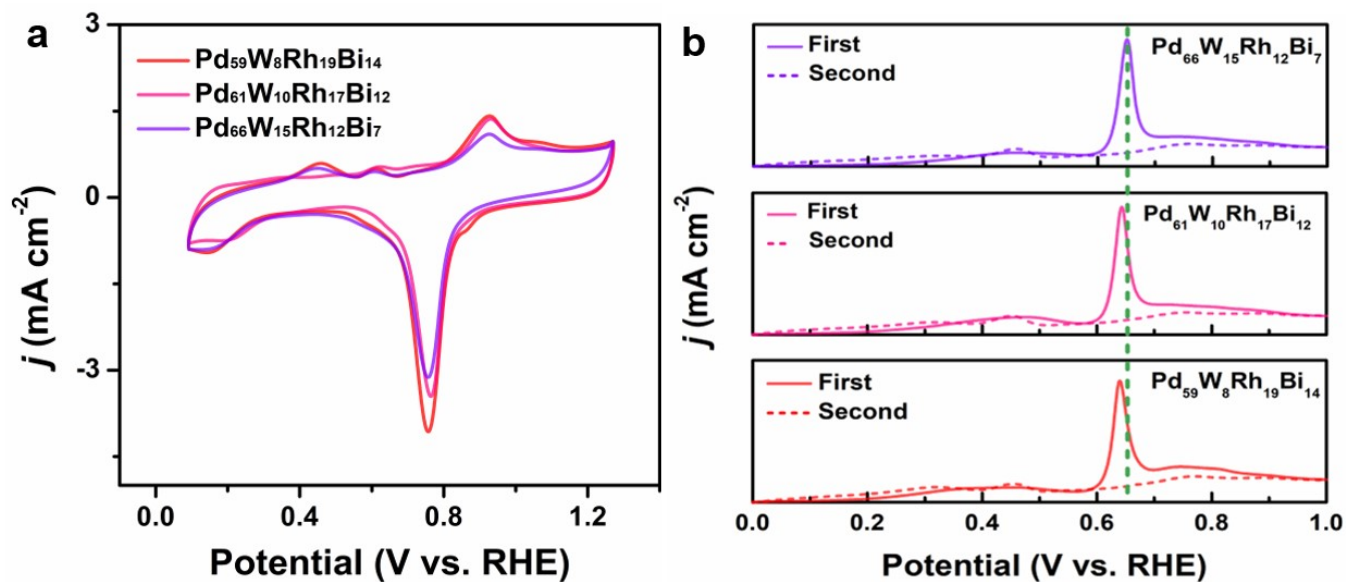

10  
 11 **Fig. S22.** CO stripping curves of different electrocatalysts in 1.0 M KOH electrolyte.



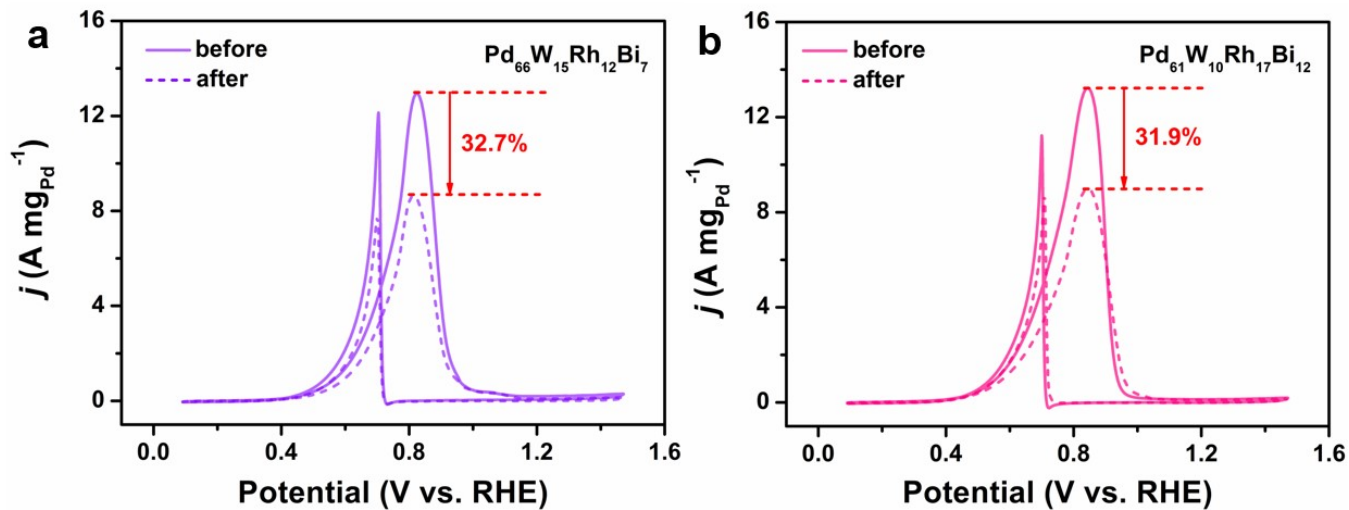

Fig. S23. CV curves of (a)  $\text{Pd}_{66}\text{W}_{15}\text{Rh}_{12}\text{Bi}_7$  and (b)  $\text{Pd}_{61}\text{W}_{10}\text{Rh}_{17}\text{Bi}_{12}$  before and after 5000 cycles test.

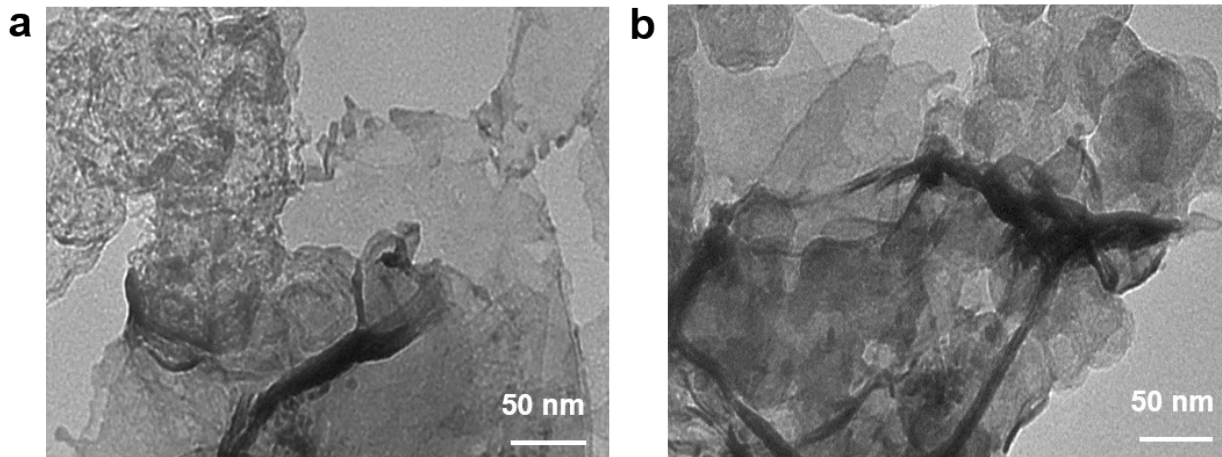

Fig. S24. TEM images of (a)  $\text{Pd}_{66}\text{W}_{15}\text{Rh}_{12}\text{Bi}_7$  and (b)  $\text{Pd}_{61}\text{W}_{10}\text{Rh}_{17}\text{Bi}_{12}$  after EOR stability measurement.

1

**Table S1.** Atomic ratios of PdWRhBi characterized by ICP.

| <b>Samples</b>                                                     | <b>Pd<br/>atom%</b> | <b>W<br/>atom%</b> | <b>Rh<br/>atom%</b> | <b>Bi<br/>atom%</b> |
|--------------------------------------------------------------------|---------------------|--------------------|---------------------|---------------------|
| Pd <sub>59</sub> W <sub>8</sub> Rh <sub>19</sub> Bi <sub>14</sub>  | 59.3                | 7.7                | 18.6                | 14.4                |
| Pd <sub>61</sub> W <sub>10</sub> Rh <sub>17</sub> Bi <sub>12</sub> | 60.5                | 10.4               | 16.8                | 12.3                |
| Pd <sub>66</sub> W <sub>15</sub> Rh <sub>12</sub> Bi <sub>7</sub>  | 66.2                | 14.6               | 11.8                | 7.4                 |

2

3

4

**Table S2.** ECSA of different electrocatalysts catalysts.

| <b>Electrocatalysts</b>                                            | <b>ECSA / m<sup>2</sup> g<sup>-1</sup></b> |
|--------------------------------------------------------------------|--------------------------------------------|
| Pt/C                                                               | 73.3                                       |
| Pd/C                                                               | 41.5                                       |
| Pd <sub>97</sub> W <sub>3</sub>                                    | 80.3                                       |
| Pd <sub>64</sub> W <sub>17</sub> Bi <sub>19</sub>                  | 82.0                                       |
| Pd <sub>72</sub> W <sub>11</sub> Rh <sub>17</sub>                  | 81.5                                       |
| Pd <sub>66</sub> W <sub>15</sub> Rh <sub>12</sub> Bi <sub>7</sub>  | 89.2                                       |
| Pd <sub>61</sub> W <sub>10</sub> Rh <sub>17</sub> Bi <sub>12</sub> | 90.6                                       |
| Pd <sub>59</sub> W <sub>8</sub> Rh <sub>19</sub> Bi <sub>14</sub>  | 107.4                                      |

5

6 **Table S3.** A literature survey of the activity and stability of Pd-based EOR electrocatalysts in alkaline  
7 electrolytes.

| <b>Electrocatalyst</b>                                            | <b>Electrolyte</b>           | <b>Mass<br/>Activity</b>                  | <b>Cycling<br/>stability</b>                          | <b>Chronoamperometri<br/>c stability</b>                              | <b>Reference</b> |
|-------------------------------------------------------------------|------------------------------|-------------------------------------------|-------------------------------------------------------|-----------------------------------------------------------------------|------------------|
| Pd <sub>59</sub> W <sub>8</sub> Rh <sub>19</sub> Bi <sub>14</sub> | 1.0 M KOH +<br>1.0 M ethanol | 16.70 A<br>mg <sub>Pd</sub> <sup>-1</sup> | 85.3 %<br>activity<br>retention after<br>5,000 cycles | 32% (4.3 A mg <sup>-1</sup> )<br>activity retention after<br>20,000 s | This work        |
| Pd-Au HNS                                                         | 1.0 M KOH +<br>1.0 M ethanol | 8.0A mg <sub>Pd</sub> <sup>-1</sup>       | 89 % activity<br>retention after<br>2,000 cycles      | 23% activity retention<br>after 5,000 s                               | 1                |

|                                                                   |                           |                                      |                                              |                                                                                                                                     |    |
|-------------------------------------------------------------------|---------------------------|--------------------------------------|----------------------------------------------|-------------------------------------------------------------------------------------------------------------------------------------|----|
| Pd <sub>50</sub> W <sub>27</sub> Nb <sub>23</sub> /C trimetallene | 1.0 M KOH + 1.0 M ethanol | 15.6 A mg <sup>-1</sup>              | 69.9 % activity retention after 3,000 cycles | 15.4 % activity retention after 5,000 s                                                                                             | 2  |
| 10 nm Pd <sub>3</sub> Pb nanocubes                                | 0.5 M KOH + 0.5 M EtOH    | 4.4 A mg <sub>Pd</sub> <sup>-1</sup> | NA                                           | 30% activity retention after 1,000 s                                                                                                | 3  |
| Pd/Black Phosphorus-graphene                                      | 1 M NaOH + 1 M ethanol    | 6.00 A mg <sup>-1</sup>              | NA                                           | 12% (0.71 A mg <sup>-1</sup> ) activity retention after 20,000 s                                                                    | 4  |
| Pd-Ru/TiO <sub>2</sub>                                            | 1 M NaOH + 1 M ethanol    | 2.70 A mg <sup>-1</sup>              | NA                                           | 29% (0.38 A mg <sup>-1</sup> ) activity retention after 10,000 s                                                                    | 5  |
| PdP <sub>2</sub> /rGO                                             | 0.5 M KOH + 0.5 M ethanol | 1.60 A mg <sup>-1</sup>              | NA                                           | 6% (0.05 A mg <sup>-1</sup> ) activity retention after 10,000 s                                                                     | 6  |
| PdBi-Bi(OH) <sub>3</sub> nanochains                               | 1 M NaOH + 1 M ethanol    | 5.30 A mg <sup>-1</sup>              | NA                                           | 76 % (2.12 A mg <sup>-1</sup> ) activity retention after 3,600 s, 36 % (1.00 A mg <sup>-1</sup> ) activity retention after 20,000 s | 7  |
| PdAg NDs                                                          | 1.0 M KOH + 1.0 M ethanol | 2630 mA mg <sup>-1</sup>             | 50% activity retention after 10,000 cycles   | 52% activity retention after 10,000 s                                                                                               | 8  |
| Pd/TiO <sub>2</sub> -nanosheets-black P                           | 1 M NaOH + 1 M ethanol    | 5.02 A mg <sup>-1</sup>              | NA                                           | 31% (0.87 A mg <sup>-1</sup> ) activity retention after 3,600 s                                                                     | 9  |
| Pd/Ni(OH) <sub>2</sub> /rGO                                       | 1.0 M KOH + 1.0 M ethanol | 1546 mA mg <sup>-1</sup>             | 95 % activity retention after 40,000 cycles  | 76 % activity retention after 3,600s<br>55 % activity retention after 20,000 s                                                      | 10 |
| Pd-Ni-P                                                           | 1 M NaOH + 1 M ethanol    | 4.95 A mg <sup>-1</sup>              | NA                                           | 15% (0.22 A mg <sup>-1</sup> ) activity retention after 2,000 s                                                                     | 11 |
| Au@Pd Nanorods                                                    | 1 M NaOH + 1 M ethanol    | 2.92 A mg <sup>-1</sup>              | NA                                           | 32% (0.96 A mg <sup>-1</sup> ) activity retention after 1,200 s                                                                     | 12 |
| PdS <sub>x</sub> /C                                               | 1.0 M KOH + 1.0 M ethanol | 162.1 mA mg <sup>-1</sup>            | 64.4% activity retention after 3,600 cycles  | 6 % activity retention after 3,600 s                                                                                                | 13 |
| PdCu <sub>2</sub>                                                 | 1.0 M KOH + 1.0 M ethanol | 1600 mA mg <sup>-1</sup>             | 72% activity retention after 300 cycles      | 43 % activity retention after 1,000 s                                                                                               | 14 |

1

**Table S4.**  $I_f/I_b$  ratio of different electrocatalysts for EOR in alkaline solution.

| Electrocatalysts                                                   | $I_f/I_b$ |
|--------------------------------------------------------------------|-----------|
| Pd/C                                                               | 0.81      |
| Pd <sub>97</sub> W <sub>3</sub>                                    | 0.82      |
| Pd <sub>64</sub> W <sub>17</sub> Bi <sub>19</sub>                  | 1.11      |
| Pd <sub>72</sub> W <sub>11</sub> Rh <sub>17</sub>                  | 0.95      |
| Pd <sub>66</sub> W <sub>15</sub> Rh <sub>12</sub> Bi <sub>7</sub>  | 1.08      |
| Pd <sub>61</sub> W <sub>10</sub> Rh <sub>17</sub> Bi <sub>12</sub> | 1.17      |
| Pd <sub>59</sub> W <sub>8</sub> Rh <sub>19</sub> Bi <sub>14</sub>  | 1.18      |

2

**Table S5.** Comparison performance of Pd<sub>59</sub>W<sub>8</sub>Rh<sub>19</sub>Bi<sub>14</sub> and other electrocatalysts for EOR activity and Faraday efficiency in alkaline solution.

| Catalysts                                                            | Electrolyte                  | Mass Activity                          | FE of C1 pathway (%) | Reference |
|----------------------------------------------------------------------|------------------------------|----------------------------------------|----------------------|-----------|
| Pd <sub>59</sub> W <sub>8</sub> Rh <sub>19</sub> Bi <sub>14</sub>    | 1.0 M KOH +<br>1.0 M ethanol | 16.70 A mg <sub>Pd</sub> <sup>-1</sup> | 65.41                | This work |
| Pd-Au HNS                                                            | 1.0 M KOH +<br>1.0 M ethanol | 8.0 A mg <sup>-1</sup> <sub>Pd</sub>   | 33.2                 | 1         |
| Pd <sub>50</sub> W <sub>27</sub> Nb <sub>23</sub> /C<br>trimetallene | 1.0 M KOH +<br>1.0 M ethanol | 15.6 A mg <sup>-1</sup> <sub>Pd</sub>  | 55.5                 | 2         |
| RhPb-PbO <sub>2</sub> /C                                             | 1.0 M NaOH+<br>1.0 M ethanol | 2.64 A mg <sup>-1</sup>                | 20                   | 15        |
| CoP/RGO-Pd                                                           | 1.0 M KOH +<br>1.0 M ethanol | 4.60 A mg <sup>-1</sup>                | 27.6                 | 16        |
| Ag@Pd <sub>2</sub> P <sub>0.2</sub>                                  | 1.0 M KOH +<br>1.0 M ethanol | 7.24 A mg <sup>-1</sup>                | 19                   | 17        |
| Pt <sub>54</sub> Rh <sub>4</sub> Cu <sub>42</sub><br>CNBs            | 1.0 M KOH +<br>1.0 M ethanol | 4.09 A mg <sup>-1</sup>                | 40.7                 | 18        |
| Pd/Ni(OH) <sub>2</sub> /rGO                                          | 1.0 M KOH +<br>1.0 M ethanol | 1.5 A mg <sup>-1</sup>                 | 26                   | 10        |

5

6

7

## 1 References

- 2 1. F. Lv, W. Zhang, M. Sun, F. Lin, T. Wu, P. Zhou, W. Yang, P. Gao, B. Huang and S. Guo, *Adv.*  
3 *Energy Mater.*, 2021, **11**, 2100187.
- 4 2. Y. Qin, H. Huang, W. Yu, H. Zhang, Z. Li, Z. Wang, J. Lai, L. Wang and S. Feng, *Adv. Sci.*, 2022,  
5 **9**, 2103722.
- 6 3. X. Yu, Z. Luo, T. Zhang, P. Tang, J. Li, X. Wang, J. Llorca, J. Arbiol, J. Liu and A. Cabot, *Chem.*  
7 *Mater.*, 2020, **32**, 2044-2052.
- 8 4. T. Wu, Y. Ma, Z. Qu, J. Fan, Q. Li, P. Shi, Q. Xu and Y. Min, *ACS Appl. Mater. Interfaces*, 2019,  
9 **11**, 5136-5145.
- 10 5. X. Liu, L. Ning, M. Deng, J. Wu, A. Zhu, Q. Zhang and Q. Liu, *Nanoscale*, 2019, **11**, 3311-3317.
- 11 6. J. Liu, Z. Luo, J. Li, X. Yu, J. Llorca, D. Nasiou, J. Arbiol, M. Meyns and A. Cabot, *Appl. Catal. B:*  
12 *Environ.*, 2019, **242**, 258-266.
- 13 7. X. Yuan, Y. Zhang, M. Cao, T. Zhou, X. Jiang, J. Chen, F. Lyu, Y. Xu, J. Luo, Q. Zhang and Y.  
14 Yin, *Nano Lett.*, 2019, **19**, 4752-4759.
- 15 8. W. Huang, X. Kang, C. Xu, J. Zhou, J. Deng, Y. Li and S. Cheng, *Adv. Mater.*, 2018, **30**, 1706962.
- 16 9. T. Wu, J. Fan, Q. Li, P. Shi, Q. Xu and Y. Min, *Adv. Energy Mater.*, 2017, **8**, 1701799.
- 17 10. W. Huang, X. Ma, H. Wang, R. Feng, J. Zhou, P. Duchesne, P. Zhang, F. Chen, N. Han, F. Zhao, J.  
18 Zhou, W. Cai and Y. Li, *Adv. Mater.*, 2017, **29**, 1703057.
- 19 11. L. Chen, L. Lu, H. Zhu, Y. Chen, Y. Huang, Y. Li and L. Wang, *Nat. Commun.*, 2017, **8**, 14136.
- 20 12. Y. Chen, Z. Fan, Z. Luo, X. Liu, Z. Lai, B. Li, Y. Zong, L. Gu and H. Zhang, *Adv. Mater.*, 2017, **29**,  
21 1701331.
- 22 13. Q. Zhang, F. Zhang, X. Ma, Y. Zheng and S. Hou, *J. Power Sources*, 2016, **336**, 1-7.
- 23 14. J. Xue, G. Han, W. Ye, Y. Sang, H. Li, P. Guo and S. Zhao, *ACS Appl. Mater. Interfaces*, 2016, **8**,  
24 34497-34505.
- 25 15. B. Lan, M. Huang, L. Wei, N. Wang, L. Wang and Y. Yang, *Small*, 2020, **16**, e2004380.
- 26 16. M. Wang, R. Ding, Y. Xiao, H. Wang, L. Wang, C. Chen, Y. Mu, G. Wu and B. Lv, *ACS Appl.*  
27 *Mater. Interfaces*, 2020, **12**, 28903-28914.
- 28 17. X. Yang, Z. Liang, S. Chen, M. Ma, Q. Wang, X. Tong, Q. Zhang, J. Ye, L. Gu and N. Yang, *Small*,  
29 2020, **16**, e2004727.
- 30 18. S. Han, H. Liu, P. Chen, J. Jiang and Y. Chen, *Adv. Energy Mater.*, 2018, **8**, 1801326.

31
